# Supplementary material for: TGF-ß Sma/Mab Signaling Mutations Uncouple Reproductive Aging from Somatic Aging
Source: PLOS journal article supplement (doi:10.1371/journal.pgen.1000789), 2009-12-23
Supplement: S10 (10.1371/journal.pgen.1000789.s010) [file journal.pgen.1000789.s010]

| <b>Genotype</b>      | <b>mean RS±<br/>std. error</b> | <b>% change</b> | <b>P-value</b> | <b>N=</b> |
|----------------------|--------------------------------|-----------------|----------------|-----------|
| <b>Experiment 1:</b> |                                |                 |                |           |
| wild type            | <b>3.5±0.2</b>                 | --              | --             | 30        |
| <i>daf-7(e1372)</i>  | <b>5.4±0.1</b>                 | <b>+54%</b>     | <0.0001        | 30        |
| <b>Experiment 2:</b> |                                |                 |                |           |
| wild type            | <b>3.6±0.2</b>                 | --              | --             | 30        |
| <i>daf-1(m40)</i>    | <b>4.9±0.1</b>                 | <b>+36%</b>     | <0.0001        | 30        |
| <i>daf-14(m77)</i>   | <b>5.3±0.2</b>                 | <b>+47%</b>     | <0.0001        | 30        |
| <b>Experiment 3:</b> |                                |                 |                |           |
| wild type            | <b>3.8 ±0.2</b>                | --              | --             | 45        |
| <i>daf-4(e1364)</i>  | <b>7.7 ±0.3</b>                | <b>+103%</b>    | <0.0001        | 26        |
| <b>Experiment 4:</b> |                                |                 |                |           |
| wild type            | <b>3.9±0.3</b>                 | --              | --             | 12        |
| <i>daf-7(e1372)</i>  | <b>5.6±0.2</b>                 | <b>+44%</b>     | <0.0001        | 17        |
| <b>Experiment 5:</b> |                                |                 |                |           |
| wild type            | <b>3.3±0.1</b>                 | --              | --             | 30        |
| <i>daf-7(e1372)</i>  | <b>4.1±0.2</b>                 | <b>+24%</b>     | <0.0001        | 30        |
| <i>daf-14(m77)</i>   | <b>4.4±0.2</b>                 | <b>+33%</b>     | <0.0001        | 30        |
